# Supplementary material
Source: publisher figshare collection journal article supplement (https://karger.figshare.com/ndownloader/files/30569763)
Supplement: Supplementary file 1 [file 30569763]

**Supplementary table S2:** Urinary cytokine levels in scI/RI model normalized to urinary creatinine (day 8)

| cytokine/creatinine ratio  [pg/mg] | SHAM | placebo | finerenone  10 mg/kg | empagliflozin  30 mg/kg |
| --- | --- | --- | --- | --- |
| IL-10 | 0.51 ± 0.29 | 0.83 ± 0.50 | 0.97 ± 0.31 | 1.03 ± 0.37 |
| IL-1β | 0.12 ± 0.07 | 0.20 ± 0.12 | 0.16 ± 0.09 | 0.16 ± 0.11 |
| IL-5 | 0.30 ± 0.21 | 152.5 ± 36.4 | 144.1 ± 29.4 | 142.6 ± 20.3 |
| KC | 4.28 ± 1.41 | 4.16 ± 1.26 | 3.73 ± 0.87 | 3.84 ± 1.13 |
| TNF-α | 1.68 ± 0.43 | 1.16 ± 0.71 | 0.85 ± 0.57 | 0.98 ± 0.92 |
| MIP-2 | 1.25 ± 0.73 | 2.03 ± 1.30 | 1.83 ± 1.46 | 1.62 ± 1.19 |
| MIP-1α | 14.5 ± 4.0 | 16.3 ± 3.6 | 16.4 ± 2.7 | 16.2 ± 5.4 |
| IP-10 | 11.09 ± 5.12 | 21.39 ± 18.59 | 20.38 ± 7.36 | 23.57 ± 9.35 |
| IL-17 | 0.12 ± 0.09 | 0.11 ± 0.06 | 0.08 ± 0.05 | 0.10 ± 0.06 |
| IL-6 | 1.08 ± 0.65* | 4.73 ± 2.07 | 4.84 ± 2.55 | 4.76 ± 1.51 |
| *SHAM n = 6, all other groups n = 10; data are expressed as means ± SD. Differences between placebo group were analyzed by one-way ANOVA with Dunnett’s corrections for multiple comparisons. Statistical significance was defined as p ≤ 0.05. Abbreviations: IL-10 = interleukin-10; IL-1β = interleukin 1 beta, IL-5 = interleukin-5; KC = keratinocyte chemoattractant; TNF-α = tumor necrosis factor alpha; MIP-2 = macrophage inflammatory protein 2; MIP-1α = macrophage inflammatory protein-1 alpha; IP-10 = interferon-gamma induced protein 10; IL-17 = interleukin 17; IL-6 = interleukin 6* | | | | |
